## Corrigendum

# Corrigendum to: Effect of raspberry extract on wound healing

Wenjing Lu (陆文静)<sup>1</sup>, Meng Xu (徐萌)<sup>1</sup>, Youwei Yuan (袁友卫)<sup>1</sup>,  
Xuemei Zhang (张雪梅)<sup>2</sup>, Jianxin Tan (檀建新)<sup>1</sup>, Junping He (何俊萍)<sup>1,\*</sup> and  
Yiling Tian (田益玲)<sup>1,\*</sup>

<sup>1</sup>College of Food Science and Technology, Hebei Agricultural University, Baoding, China and <sup>2</sup>College of Forestry, Hebei Agricultural University, Baoding, China

\*Correspondence to: Dr. Junping He and Yiling Tian, No. 2596 Lekai South Road, Baoding 071000, China.  
Email: [1176937802@qq.com](mailto:1176937802@qq.com) (Dr. Junping He), [tougaotian@126.com](mailto:tougaotian@126.com) (Yiling Tian)

*Food Quality and Safety*, Volume 5, 2021, fyab013, <https://doi.org/10.1093/fqsafe/fyab013>

Following article publication, the authors provided additional information about the animal experiments reported herein: ‘The

experiments reported here comply with the current laws of China. Research methods used in this study were reviewed and approved by the Animal Ethics Committee of Hebei Agricultural University (Permit No. 2020129)’. The authors regret this omission.
